# Supplementary material
Source: Research Square preprint supplement (doi:10.21203/rs.3.rs-9271883/v1)
Supplement: Supplementary file 1 [file 46750ed74c8d12918b76ae39.docx]

| **Parameter** | **Value** |
| --- | --- |
| Total hips evaluated | 44 |
| Unilateral cases | 22 |
| Bilateral cases | 11 |
| Right hips | 18 |
| Left hips | 26 |
| Female patients | 28 |
| Male patients | 5 |
| Median age at diagnosis (T0) | 46 ± 40 days |
| Age range at diagnosis | 4–150 days |
| Hips with positive Ortolani manoeuvre | 19 |
